# Supplementary material for: Cohesin Core Complex Gene Dosage Contributes to Germinal Center Derived Lymphoma Phenotypes and Outcomes
Source: Front Immunol. 2021 Sep 21;12:688493. doi: 10.3389/fimmu.2021.688493 (PMC8490713; doi:10.3389/fimmu.2021.688493)
Supplement: Supplementary file 9 [file Table_2.xlsx]

## Sheet: Supplementary_Table_2_mutations
Gene	Mouse	Case	Chr	Pos	Ref_Allele	Alt_Allele	Read Depth Tumor	Read Depth Normal	Ref Tumor	Alt Tumor	Ref Normal	Alt Normal	Type	NumCallers	Callers	VAF Tumor	VAF Normal	GeneID	Feature	FeatureType	Consequence	ProteinChange	dbSNP	cDNA_position	CDS_position	Protein_position	Amino_acids	Codons	Existing_variation	Built	APPRIS	BIOTYPE	CANONICAL	CCDS	DISTANCE	DOMAINS	ENSP	EXON	FLAGS	GENE_PHENO	HGVS_OFFSET	HGVSc	HGVSp	IMPACT	INTRON	PUBMED	SIFT	STRAND	SWISSPROT
Lef1	Het	16_Het	chr3	131111626	A	G	89	252	68	21	252	0	SNP	3	S,V,M	23.5955	0	ENSMUSG00000027985	ENSMUST00000106341	Transcript	missense_variant	p.Lys52Arg	-	1156	155	52	K/R	aAg/aGg	-	mm10	A1	protein_coding	YES	CCDS71319.1		hmmpanther:PTHR10373,Gene3D:4.10.900.10,Pfam_domain:PF08347	ENSMUSP00000101948	2021-01-10		1		ENSMUST00000106341.8:c.155A>G	ENSMUSP00000101948.2:p.Lys52Arg	MODERATE			deleterious(0)	1	P27782
Il6	Het	16_Het	chr5	30014911	G	T	132	337	103	29	337	0	SNP	3	S,V,M	21.9697	0	ENSMUSG00000025746	ENSMUST00000199765	Transcript	missense_variant	p.Arg78Ile	-	320	233	78	R/I	aGa/aTa	-	mm10	A2	protein_coding	YES	CCDS19153.1		hmmpanther:PTHR11457,hmmpanther:PTHR11457:SF0,Gene3D:1.20.1250.10,PIRSF_domain:PIRSF001935,Pfam_domain:PF00489,SMART_domains:SM00126,Superfamily_domains:SSF47266,Prints_domain:PR00434	ENSMUSP00000143157	2021-02-04		1		ENSMUST00000199765.1:c.233G>T	ENSMUSP00000143157.1:p.Arg78Ile	MODERATE			tolerated(0.08)	1	P08505
Lbr	Het	25_Het	chr1	181818975	C	A	77	213	69	8	213	0	SNP	2	S,M	10.3896	0	ENSMUSG00000004880	ENSMUST00000005003	Transcript	missense_variant	p.Asp461Tyr	-	1487	1381	461	D/Y	Gac/Tac	-	mm10	P1	protein_coding	YES	CCDS15584.1		hmmpanther:PTHR21257,hmmpanther:PTHR21257:SF37,Pfam_domain:PF01222	ENSMUSP00000005003	2021-11-14		1		ENSMUST00000005003.11:c.1381G>T	ENSMUSP00000005003.6:p.Asp461Tyr	MODERATE			deleterious(0)	-1	Q3U9G9
Carf	Het	25_Het	chr1	60147977	C	A	59	242	50	9	242	0	SNP	2	S,M	15.2542	0	ENSMUSG00000026017	ENSMUST00000187978	Transcript	missense_variant	p.Gln580Lys	-	1865	1738	580	Q/K	Cag/Aag	-	mm10	P3	protein_coding	YES	CCDS14989.1		hmmpanther:PTHR14694,hmmpanther:PTHR14694:SF1	ENSMUSP00000141169	14/15		1		ENSMUST00000187978.6:c.1738C>A	ENSMUSP00000141169.1:p.Gln580Lys	MODERATE			deleterious_low_confidence(0.02)	1	Q8VHI4
E2f7	Het	25_Het	chr10	110763972	C	A	55	175	46	9	175	0	SNP	2	S,M	16.3636	0	ENSMUSG00000020185	ENSMUST00000073781	Transcript	stop_gained	p.Ser196*	-	799	587	196	S/*	tCg/tAg	-	mm10	P1	protein_coding	YES	CCDS36055.1		Gene3D:1.10.10.10,Pfam_domain:PF02319,hmmpanther:PTHR12081,hmmpanther:PTHR12081:SF25,SMART_domains:SM01372,Superfamily_domains:SSF46785	ENSMUSP00000073453	2021-05-13		1		ENSMUST00000073781.11:c.587C>A	ENSMUSP00000073453.5:p.Ser196Ter	HIGH				1	Q6S7F2
Ros1	Het	25_Het	chr10	52066360	C	A	45	219	39	6	218	1	SNP	2	S,M	13.3333	0.456621	ENSMUSG00000019893	ENSMUST00000218452	Transcript	missense_variant	p.Arg2068Leu	-	6203	6203	2068	R/L	cGg/cTg	-	mm10	A2	protein_coding	YES	CCDS23838.1		Gene3D:1.10.510.10,Pfam_domain:PF07714,PROSITE_profiles:PS50011,hmmpanther:PTHR24416,hmmpanther:PTHR24416:SF344,SMART_domains:SM00219,Superfamily_domains:SSF56112	ENSMUSP00000151720	41/44		1		ENSMUST00000218452.1:c.6203G>T	ENSMUSP00000151720.1:p.Arg2068Leu	MODERATE			deleterious(0)	-1	Q78DX7
Ctnna3	Het	25_Het	chr10	64946001	C	A	82	302	73	9	301	0	SNP	2	S,M	10.9756	0	ENSMUSG00000060843	ENSMUST00000105441	Transcript	missense_variant	p.Leu748Ile	-	2329	2242	748	L/I	Ctt/Att	-	mm10	P1	protein_coding	YES	CCDS23901.1		hmmpanther:PTHR18914,hmmpanther:PTHR18914:SF21,Gene3D:1.20.120.230,Pfam_domain:PF01044,Superfamily_domains:SSF47220	ENSMUSP00000101081	16/18		1		ENSMUST00000105441.7:c.2242C>A	ENSMUSP00000101081.1:p.Leu748Ile	MODERATE			deleterious(0.03)	1	Q65CL1
Brca1	Het	25_Het	chr11	101512784	C	A	53	212	46	7	212	0	SNP	2	S,M	13.2075	0	ENSMUSG00000017146	ENSMUST00000017290	Transcript	missense_variant	p.Asp1431Tyr	-	4421	4291	1431	D/Y	Gac/Tac	-	mm10	P1	protein_coding	YES	CCDS25474.1		hmmpanther:PTHR13763,hmmpanther:PTHR13763:SF0,PIRSF_domain:PIRSF001734	ENSMUSP00000017290	13/23		1		ENSMUST00000017290.10:c.4291G>T	ENSMUSP00000017290.4:p.Asp1431Tyr	MODERATE			deleterious(0)	-1	P48754
Vwc2	Het	25_Het	chr11	11116417	C	A	26	108	19	7	108	0	SNP	3	S,V,M	26.9231	0	ENSMUSG00000050830	ENSMUST00000129670	Transcript	missense_variant,NMD_transcript_variant	p.Phe168Leu	-	636	504	168	F/L	ttC/ttA	-	mm10	P1	nonsense_mediated_decay	YES	CCDS36111.1		hmmpanther:PTHR11339,SMART_domains:SM00214	ENSMUSP00000128761	2021-02-05				ENSMUST00000129670.7:c.504C>A	ENSMUSP00000128761.1:p.Phe168Leu	MODERATE			deleterious(0)	1	Q8C8N3
Sphk1	Het	25_Het	chr11	116535667	C	A	52	174	45	7	173	0	SNP	2	S,M	13.4615	0	ENSMUSG00000061878	ENSMUST00000154034	Transcript	missense_variant	p.Arg143Ser	-	722	427	143	R/S	Cgc/Agc	-	mm10	P4	protein_coding	YES	CCDS25669.1		PROSITE_profiles:PS50146,hmmpanther:PTHR12358,hmmpanther:PTHR12358:SF47,SMART_domains:SM00046,Superfamily_domains:SSF111331	ENSMUSP00000121219	2021-06-06	cds_end_NF	1		ENSMUST00000154034.7:c.427C>A	ENSMUSP00000121219.1:p.Arg143Ser	MODERATE			tolerated(0.14)	1	Q8CI15
Pde6g	Het	25_Het	chr11	120448154	C	A	98	218	88	10	218	0	SNP	2	S,M	10.2041	0	ENSMUSG00000025386	ENSMUST00000026452	Transcript	missense_variant	p.Trp70Leu	-	372	209	70	W/L	tGg/tTg	-	mm10	P1	protein_coding	YES	CCDS36389.1		hmmpanther:PTHR12122,PIRSF_domain:PIRSF000969,Gene3D:2ju4A00,Pfam_domain:PF04868	ENSMUSP00000026452	2021-04-04		1		ENSMUST00000026452.2:c.209G>T	ENSMUSP00000026452.2:p.Trp70Leu	MODERATE			deleterious_low_confidence(0.02)	-1	P09174
Traf4	Het	25_Het	chr11	78160269	C	A	72	208	63	9	208	0	SNP	2	S,M	12.5	0	ENSMUSG00000017386	ENSMUST00000017530	Transcript	missense_variant	p.Gly354Cys	-	1209	1060	354	G/C	Ggc/Tgc	-	mm10	P1	protein_coding	YES	CCDS25090.1		Gene3D:2.60.210.10,PIRSF_domain:PIRSF015614,PROSITE_profiles:PS50144,hmmpanther:PTHR10131,hmmpanther:PTHR10131:SF89,SMART_domains:SM00061,Superfamily_domains:SSF49599	ENSMUSP00000017530	2021-07-07		1		ENSMUST00000017530.3:c.1060G>T	ENSMUSP00000017530.3:p.Gly354Cys	MODERATE			deleterious(0)	-1	Q61382
Mycbp2	Het	25_Het	chr14	103117095	C	A	95	279	85	10	279	0	SNP	2	S,M	10.5263	0	ENSMUSG00000033004	ENSMUST00000161008	Transcript	missense_variant	p.Met1412Ile	-	4234	4236	1412	M/I	atG/atT	-	mm10	A2	protein_coding	YES	CCDS49559.1			ENSMUSP00000124443	27/28	cds_start_NF	1		ENSMUST00000161008.7:c.4234G>T	ENSMUSP00000124443.1:p.Met1412Ile	MODERATE			tolerated(0.24)	-1
Parg	Het	25_Het	chr14	32208983	C	A	90	262	81	9	261	1	SNP	2	S,M	10	0.381679	ENSMUSG00000021911	ENSMUST00000171279	Transcript	missense_variant	p.Gln104Lys	-	554	310	104	Q/K	Cag/Aag	-	mm10	A2	protein_coding	YES	CCDS36865.1			ENSMUSP00000128629	2021-03-03	cds_end_NF	1		ENSMUST00000171279.1:c.310C>A	ENSMUSP00000128629.1:p.Gln104Lys	MODERATE			tolerated(0.07)	1	O88622
Vdr	Het	25_Het	chr15	97857628	C	A	44	132	37	7	132	0	SNP	2	S,M	15.9091	0	ENSMUSG00000022479	ENSMUST00000023119	Transcript	missense_variant	p.Arg338Leu	-	1167	1013	338	R/L	cGa/cTa	-	mm10	P1	protein_coding	YES	CCDS27784.1		Gene3D:1.10.565.10,Pfam_domain:PF00104,hmmpanther:PTHR24082,hmmpanther:PTHR24082:SF38,SMART_domains:SM00430,Superfamily_domains:SSF48508	ENSMUSP00000023119	2021-10-10		1		ENSMUST00000023119.14:c.1013G>T	ENSMUSP00000023119.8:p.Arg338Leu	MODERATE			deleterious(0.03)	-1	P48281
Cacnb3	Het	25_Het	chr15	98642022	C	A	87	215	76	11	214	0	SNP	2	S,M	12.6437	0	ENSMUSG00000003352	ENSMUST00000109150	Transcript	missense_variant	p.His275Asn	-	1082	823	275	H/N	Cac/Aac	-	mm10	P1	protein_coding	YES	CCDS37192.1		Gene3D:3.40.50.300,Pfam_domain:PF00625,Prints_domain:PR01626,hmmpanther:PTHR11824,SMART_domains:SM00072,Superfamily_domains:SSF52540	ENSMUSP00000104778	2021-10-13		1		ENSMUST00000109150.7:c.823C>A	ENSMUSP00000104778.1:p.His275Asn	MODERATE			tolerated(0.05)	1	P54285
Snx29	Het	25_Het	chr16	11656179	C	A	60	196	53	7	196	0	SNP	2	S,M	11.6667	0	ENSMUSG00000071669	ENSMUST00000096273	Transcript	stop_gained	p.Ser309*	-	971	926	309	S/*	tCg/tAg	-	mm10		protein_coding		CCDS79422.1		hmmpanther:PTHR24115,hmmpanther:PTHR24115:SF488,Gene3D:3.30.1520.10	ENSMUSP00000093993	2021-10-14		1		ENSMUST00000096273.8:c.926C>A	ENSMUSP00000093993.2:p.Ser309Ter	HIGH				1	Q9D3S3
Prkdc	Het	25_Het	chr16	15684239	C	A	57	297	51	6	297	0	SNP	2	S,M	10.5263	0	ENSMUSG00000022672	ENSMUST00000023352	Transcript	stop_gained	p.Ser840*	-	2519	2519	840	S/*	tCg/tAg	-	mm10	P1	protein_coding	YES	CCDS27978.1		hmmpanther:PTHR11139,hmmpanther:PTHR11139:SF68,Superfamily_domains:SSF48371	ENSMUSP00000023352	22/86		1		ENSMUST00000023352.8:c.2519C>A	ENSMUSP00000023352.7:p.Ser840Ter	HIGH				1	P97313
Zdhhc8	Het	25_Het	chr16	18224399	C	A	30	72	23	7	72	0	SNP	3	S,V,M	23.3333	0	ENSMUSG00000060166	ENSMUST00000076957	Transcript	missense_variant	p.Asp646Tyr	-	2062	1936	646	D/Y	Gac/Tac	-	mm10	P1	protein_coding	YES	CCDS28017.1		hmmpanther:PTHR12349,hmmpanther:PTHR12349:SF1	ENSMUSP00000076224	2021-10-11		1		ENSMUST00000076957.5:c.1936G>T	ENSMUSP00000076224.5:p.Asp646Tyr	MODERATE			deleterious(0)	-1	Q5Y5T5
St6gal1	Het	25_Het	chr16	23321476	C	A	86	245	77	9	245	0	SNP	2	S,M	10.4651	0	ENSMUSG00000022885	ENSMUST00000178797	Transcript	missense_variant	p.Phe132Leu	-	881	396	132	F/L	ttC/ttA	-	mm10	P1	protein_coding	YES	CCDS28077.1		PIRSF_domain:PIRSF005557,hmmpanther:PTHR13713,hmmpanther:PTHR13713:SF55	ENSMUSP00000136206	2021-04-08		1		ENSMUST00000178797.7:c.396C>A	ENSMUSP00000136206.1:p.Phe132Leu	MODERATE				1	Q64685
Slc30a6	Het	25_Het	chr17	74407280	C	A	77	307	69	8	306	1	SNP	2	S,M	10.3896	0.325733	ENSMUSG00000024069	ENSMUST00000024870	Transcript	stop_gained	p.Ser93*	-	336	278	93	S/*	tCa/tAa	-	mm10	P3	protein_coding		CCDS37691.1		Superfamily_domains:0054606,Gene3D:3h90A01,Pfam_domain:PF01545,hmmpanther:PTHR11562,hmmpanther:PTHR11562:SF56,TIGRFAM_domain:TIGR01297	ENSMUSP00000024870	2021-05-14				ENSMUST00000024870.6:c.278C>A	ENSMUSP00000024870.6:p.Ser93Ter	HIGH				1	Q8BJM5
Rfx3	Het	25_Het	chr19	27826073	A	G	159	391	116	43	391	0	SNP	3	S,V,M	27.044	0	ENSMUSG00000040929	ENSMUST00000174850	Transcript	missense_variant	p.Tyr271His	-	988	811	271	Y/H	Tac/Cac	-	mm10	P1	protein_coding	YES	CCDS29725.1		hmmpanther:PTHR12619,hmmpanther:PTHR12619:SF20	ENSMUSP00000133461	2021-07-17		1		ENSMUST00000174850.7:c.811T>C	ENSMUSP00000133461.1:p.Tyr271His	MODERATE			tolerated(0.75)	-1	P48381
Pten	Het	25_Het	chr19	32815468	C	A	81	244	72	9	244	0	SNP	2	S,M	11.1111	0	ENSMUSG00000013663	ENSMUST00000013807	Transcript	stop_gained	p.Ser229*	-	1634	686	229	S/*	tCa/tAa	-	mm10	P1	protein_coding	YES	CCDS29753.1		PROSITE_profiles:PS51182,hmmpanther:PTHR12305,PIRSF_domain:PIRSF038025,Gene3D:1d5rA02,Pfam_domain:PF10409,SMART_domains:SM01326,Superfamily_domains:SSF49562	ENSMUSP00000013807	2021-07-09		1		ENSMUST00000013807.7:c.686C>A	ENSMUSP00000013807.7:p.Ser229Ter	HIGH				1	O08586
Lipa	Het	25_Het	chr19	34494126	C	A	94	234	84	10	234	0	SNP	2	S,M	10.6383	0	ENSMUSG00000024781	ENSMUST00000178114	Transcript	missense_variant	p.Asp350Tyr	-	1157	1048	350	D/Y	Gac/Tac	-	mm10	P1	protein_coding	YES	CCDS29760.1		Gene3D:3.40.50.1820,Pfam_domain:PF00561,PIRSF_domain:PIRSF000862,hmmpanther:PTHR11005,hmmpanther:PTHR11005:SF26,Superfamily_domains:SSF53474	ENSMUSP00000136967	2021-10-10		1		ENSMUST00000178114.1:c.1048G>T	ENSMUSP00000136967.1:p.Asp350Tyr	MODERATE			deleterious(0)	-1	Q9Z0M5
Atrnl1	Het	25_Het	chr19	57699737	C	A	54	112	47	7	112	0	SNP	2	S,M	12.963	0	ENSMUSG00000054843	ENSMUST00000077282	Transcript	splice_region_variant,intron_variant	-	-	-	-	-	-	-	-	mm10	P1	protein_coding	YES	CCDS29928.1			ENSMUSP00000076514					ENSMUST00000077282.5:c.2626+7C>A		LOW	16/28			1	Q6A051
Atrnl1	Het	25_Het	chr19	57753289	C	A	114	290	101	13	290	0	SNP	2	S,M	11.4035	0	ENSMUSG00000054843	ENSMUST00000077282	Transcript	stop_gained	p.Ser1160*	-	3799	3479	1160	S/*	tCa/tAa	-	mm10	P1	protein_coding	YES	CCDS29928.1		hmmpanther:PTHR10574,hmmpanther:PTHR10574:SF224,Low_complexity_(Seg):seg	ENSMUSP00000076514	23/29				ENSMUST00000077282.5:c.3479C>A	ENSMUSP00000076514.5:p.Ser1160Ter	HIGH				1	Q6A051
Eif2ak4	Het	25_Het	chr2	118432272	C	A	116	360	103	13	358	0	SNP	2	S,M	11.2069	0	ENSMUSG00000005102	ENSMUST00000110874	Transcript	missense_variant	p.Gln691Lys	-	2482	2071	691	Q/K	Caa/Aaa	-	mm10	P1	protein_coding	YES	CCDS50669.1		PROSITE_profiles:PS50011,hmmpanther:PTHR11042,hmmpanther:PTHR11042:SF90,SMART_domains:SM00220	ENSMUSP00000106498	14/40		1		ENSMUST00000110874.7:c.2071C>A	ENSMUSP00000106498.1:p.Gln691Lys	MODERATE			tolerated(0.93)	1	Q9QZ05
Usp8	Het	25_Het	chr2	126742239	C	A	78	312	69	9	310	2	SNP	2	S,M	11.5385	0.641026	ENSMUSG00000027363	ENSMUST00000110416	Transcript	missense_variant	p.Pro456His	-	1561	1367	456	P/H	cCc/cAc	-	mm10	A2	protein_coding	YES	CCDS57185.1			ENSMUSP00000106046	2021-11-19		1		ENSMUST00000110416.2:c.1367C>A	ENSMUSP00000106046.2:p.Pro456His	MODERATE			tolerated(0.12)	1	Q80U87
Gnas	Het	25_Het	chr2	174345787	C	A	96	203	85	11	203	0	SNP	2	S,M	11.4583	0	ENSMUSG00000027523	ENSMUST00000080493	Transcript	splice_region_variant,intron_variant	-	-	-	-	-	-	-	-	mm10		protein_coding		CCDS17151.1			ENSMUSP00000079341			1		ENSMUST00000080493.11:c.3187+8C>A		LOW	2021-10-11			1	Q6R0H7
Itga4	Het	25_Het	chr2	79313762	C	A	86	401	77	9	399	0	SNP	2	S,M	10.4651	0	ENSMUSG00000027009	ENSMUST00000099972	Transcript	missense_variant	p.Phe664Leu	-	2152	1992	664	F/L	ttC/ttA	-	mm10	P1	protein_coding	YES	CCDS16168.1		hmmpanther:PTHR23220,hmmpanther:PTHR23220:SF78,Gene3D:2.60.40.1510,Pfam_domain:PF08441,Superfamily_domains:SSF69179	ENSMUSP00000099718	18/28		1		ENSMUST00000099972.4:c.1992C>A	ENSMUSP00000099718.3:p.Phe664Leu	MODERATE			tolerated(0.65)	1
Msh4	Het	25_Het	chr3	153873676	C	A	93	359	83	10	359	0	SNP	2	S,M	10.7527	0	ENSMUSG00000005493	ENSMUST00000190449	Transcript	missense_variant	p.Met405Ile	-	1860	1215	405	M/I	atG/atT	-	mm10	A2	protein_coding	YES	CCDS80067.1		hmmpanther:PTHR11361,hmmpanther:PTHR11361:SF21,PIRSF_domain:PIRSF005813,Pfam_domain:PF05190,Pfam_domain:PF05192,SMART_domains:SM00533,Superfamily_domains:SSF48334	ENSMUSP00000140265	14/21		1		ENSMUST00000190449.1:c.1215G>T	ENSMUSP00000140265.1:p.Met405Ile	MODERATE			tolerated(0.06)	-1	Q99MT2
Adar	Het	25_Het	chr3	89738030	C	A	60	158	53	7	157	1	SNP	2	S,M	11.6667	0.632911	ENSMUSG00000027951	ENSMUST00000107405	Transcript	missense_variant	p.Pro501Thr	-	1564	1501	501	P/T	Cca/Aca	-	mm10	A2	protein_coding	YES	CCDS50963.1		Gene3D:3.30.160.20,Pfam_domain:PF00035,PROSITE_profiles:PS50137,hmmpanther:PTHR10910,hmmpanther:PTHR10910:SF107,SMART_domains:SM00358,Superfamily_domains:SSF54768	ENSMUSP00000103028	2021-03-15		1		ENSMUST00000107405.5:c.1501C>A	ENSMUSP00000103028.2:p.Pro501Thr	MODERATE			tolerated(0.11)	1	Q99MU3
Notch2	Het	25_Het	chr3	98131389	C	A	41	134	34	7	133	1	SNP	2	S,M	17.0732	0.746269	ENSMUSG00000027878	ENSMUST00000079812	Transcript	missense_variant	p.Gln1283Lys	-	4008	3847	1283	Q/K	Cag/Aag	-	mm10	P1	protein_coding	YES	CCDS51013.1		Gene3D:2gy5A03,PIRSF_domain:PIRSF002279,PROSITE_profiles:PS50026,hmmpanther:PTHR24033,hmmpanther:PTHR24033:SF66,SMART_domains:SM00179,SMART_domains:SM00181,Superfamily_domains:SSF57196	ENSMUSP00000078741	23/34		1		ENSMUST00000079812.7:c.3847C>A	ENSMUSP00000078741.6:p.Gln1283Lys	MODERATE			deleterious(0)	1
Notch2	Het	25_Het	chr3	98137448	C	A	52	156	45	7	156	0	SNP	2	S,M	13.4615	0	ENSMUSG00000027878	ENSMUST00000079812	Transcript	stop_gained	p.Ser1562*	-	4846	4685	1562	S/*	tCg/tAg	-	mm10	P1	protein_coding	YES	CCDS51013.1		Pfam_domain:PF06816,PIRSF_domain:PIRSF002279,Prints_domain:PR01985,hmmpanther:PTHR24033,hmmpanther:PTHR24033:SF66,SMART_domains:SM01338	ENSMUSP00000078741	26/34		1		ENSMUST00000079812.7:c.4685C>A	ENSMUSP00000078741.6:p.Ser1562Ter	HIGH				1
Zmpste24	Het	25_Het	chr4	121081218	C	A	70	237	61	8	235	2	SNP	2	S,M	11.4286	0.843882	ENSMUSG00000043207	ENSMUST00000058754	Transcript	missense_variant	p.Met241Ile	-	965	723	241	M/I	atG/atT	-	mm10	P1	protein_coding	YES	CCDS18600.1		hmmpanther:PTHR10120,hmmpanther:PTHR10120:SF24,Gene3D:3cqbA01,Pfam_domain:PF01435	ENSMUSP00000053900	2021-06-10		1		ENSMUST00000058754.8:c.723G>T	ENSMUSP00000053900.2:p.Met241Ile	MODERATE			deleterious(0.01)	-1	Q80W54
Ephb2	Het	25_Het	chr4	136696029	C	A	66	147	57	8	146	1	SNP	2	S,M	12.1212	0.680272	ENSMUSG00000028664	ENSMUST00000105846	Transcript	missense_variant	p.Asp313Tyr	-	950	937	313	D/Y	Gac/Tac	-	mm10	A2	protein_coding	YES	CCDS18809.1		PIRSF_domain:PIRSF000666,hmmpanther:PTHR24416,hmmpanther:PTHR24416:SF123,Superfamily_domains:SSF57184	ENSMUSP00000101472	2021-04-16		1		ENSMUST00000105846.8:c.937G>T	ENSMUSP00000101472.2:p.Asp313Tyr	MODERATE			deleterious(0.01)	-1	P54763
Mpdz	Het	25_Het	chr4	81348735	C	A	38	117	31	7	117	0	SNP	2	S,M	18.4211	0	ENSMUSG00000028402	ENSMUST00000141995	Transcript	missense_variant	p.Asp314Tyr	-	940	940	314	D/Y	Gac/Tac	-	mm10	A2	protein_coding	YES	CCDS18292.1		hmmpanther:PTHR19964:SF10,hmmpanther:PTHR19964	ENSMUSP00000118283	2021-06-06	cds_start_NF,cds_end_NF	1		ENSMUST00000141995.2:c.940G>T	ENSMUSP00000118283.1:p.Asp314Tyr	MODERATE			deleterious(0)	-1	Q8VBX6
Chd7	Het	25_Het	chr4	8785390	C	A	44	170	37	7	168	1	SNP	2	S,M	15.9091	0.588235	ENSMUSG00000041235	ENSMUST00000170391	Transcript	missense_variant,splice_region_variant	p.Gln565Lys	-	1760	1693	565	Q/K	Cag/Aag	-	mm10	P1	protein_coding	YES	CCDS38689.1		hmmpanther:PTHR10799,hmmpanther:PTHR10799:SF658	ENSMUSP00000127007	2021-02-05	cds_end_NF	1		ENSMUST00000170391.1:c.1693C>A	ENSMUSP00000127007.1:p.Gln565Lys	MODERATE			deleterious_low_confidence(0.04)	1	A2AJK6
Rbm19	Het	25_Het	chr5	120118775	C	A	107	275	95	12	275	0	SNP	2	S,M	11.215	0	ENSMUSG00000029594	ENSMUST00000031590	Transcript	stop_gained	p.Ser51*	-	301	152	51	S/*	tCg/tAg	-	mm10	P1	protein_coding	YES	CCDS19616.1		PROSITE_profiles:PS50102,Gene3D:3.30.70.330,Pfam_domain:PF00076,SMART_domains:SM00360,Superfamily_domains:SSF54928	ENSMUSP00000031590	2021-02-24		1		ENSMUST00000031590.11:c.152C>A	ENSMUSP00000031590.8:p.Ser51Ter	HIGH				1	Q8R3C6
Shh	Het	25_Het	chr5	28461409	C	A	50	173	44	6	173	0	SNP	2	S,M	12	0	ENSMUSG00000002633	ENSMUST00000002708	Transcript	missense_variant	p.Gly160Cys	-	971	478	160	G/C	Ggc/Tgc	-	mm10	P1	protein_coding	YES	CCDS19146.1		hmmpanther:PTHR11889,hmmpanther:PTHR11889:SF36,Gene3D:3.30.1380.10,PIRSF_domain:PIRSF009400,Pfam_domain:PF01085,Superfamily_domains:SSF55166,Prints_domain:PR00632	ENSMUSP00000002708	2021-02-03		1		ENSMUST00000002708.4:c.478G>T	ENSMUSP00000002708.3:p.Gly160Cys	MODERATE			deleterious(0)	-1	Q62226
Ppargc1a	Het	25_Het	chr5	51473889	C	A	83	342	67	16	341	1	SNP	3	S,V,M	19.2771	0.292398	ENSMUSG00000029167	ENSMUST00000196968	Transcript	missense_variant	p.Gly466Val	-	1506	1397	466	G/V	gGt/gTt	-	mm10	P1	protein_coding	YES	CCDS19282.1		hmmpanther:PTHR15528,hmmpanther:PTHR15528:SF10	ENSMUSP00000143553	2021-08-11		1		ENSMUST00000196968.4:c.1397G>T	ENSMUSP00000143553.1:p.Gly466Val	MODERATE			deleterious(0)	-1	O70343
Pdgfra	Het	25_Het	chr5	75180170	C	A	116	345	98	18	345	0	SNP	2	S,M	15.5172	0	ENSMUSG00000029231	ENSMUST00000000476	Transcript	splice_region_variant,synonymous_variant	p.Arg597Arg	-	1953	1789	597	R	Cgg/Agg	-	mm10	P1	protein_coding		CCDS19351.1		Transmembrane_helices:TMhelix,PROSITE_profiles:PS50011,hmmpanther:PTHR24416:SF52,hmmpanther:PTHR24416,PIRSF_domain:PIRSF500950,Pfam_domain:PF07714,PIRSF_domain:PIRSF000615,Gene3D:3.30.200.20,SMART_domains:SM00219,Superfamily_domains:SSF56112	ENSMUSP00000000476	13/23		1		ENSMUST00000000476.14:c.1789C>A	ENSMUSP00000000476.8:p.Arg597%3D	LOW				1	P26618
Pot1a	Het	25_Het	chr6	25758889	G	A	110	418	71	39	418	0	SNP	3	S,V,M	35.4545	0	ENSMUSG00000029676	ENSMUST00000166445	Transcript	missense_variant	p.Ala297Val	-	890	890	297	A/V	gCa/gTa	-	mm10	P2	protein_coding	YES	CCDS39442.1		hmmpanther:PTHR14513,hmmpanther:PTHR14513:SF2,Gene3D:1xjvA02	ENSMUSP00000131928	2021-07-15		1		ENSMUST00000166445.7:c.890C>T	ENSMUSP00000131928.1:p.Ala297Val	MODERATE			tolerated(1)	-1	Q91WC1
Ssbp1	Het	25_Het	chr6	40476439	C	A	62	239	54	8	239	0	SNP	2	S,M	12.9032	0	ENSMUSG00000029911	ENSMUST00000121360	Transcript	missense_variant	p.Pro53Gln	-	800	158	53	P/Q	cCa/cAa	-	mm10	P1	protein_coding	YES	CCDS39466.1		PROSITE_profiles:PS50935,HAMAP:MF_00984,hmmpanther:PTHR10302,PIRSF_domain:PIRSF002070,Gene3D:2.40.50.140,Pfam_domain:PF00436,TIGRFAM_domain:TIGR00621,Superfamily_domains:SSF50249	ENSMUSP00000113563	2021-03-06	cds_end_NF	1		ENSMUST00000121360.7:c.158C>A	ENSMUSP00000113563.1:p.Pro53Gln	MODERATE			deleterious(0.03)	1	Q9CYR0
Zg16	Het	25_Het	chr7	127050568	C	A	25	61	17	8	61	0	SNP	3	S,V,M	32	0	ENSMUSG00000049350	ENSMUST00000205559	Transcript	missense_variant	p.Asp74Tyr	-	631	220	74	D/Y	Gac/Tac	-	mm10	P1	protein_coding	YES	CCDS21856.1		Gene3D:2.100.10.30,PROSITE_profiles:PS51752,hmmpanther:PTHR33589,hmmpanther:PTHR33589:SF3,Superfamily_domains:SSF51101	ENSMUSP00000145957	2021-05-05	cds_end_NF			ENSMUST00000205559.1:c.220G>T	ENSMUSP00000145957.1:p.Asp74Tyr	MODERATE			deleterious(0.01)	-1	Q8K0C5
Fosb	Het	25_Het	chr7	19306569	C	A	99	253	88	11	253	0	SNP	2	S,M	11.1111	0	ENSMUSG00000003545	ENSMUST00000208446	Transcript	missense_variant	p.Arg182Leu	-	714	545	182	R/L	cGa/cTa	-	mm10	P1	protein_coding	YES	CCDS20897.1		Coiled-coils_(Ncoils):Coil,PROSITE_profiles:PS50217,hmmpanther:PTHR23351,hmmpanther:PTHR23351:SF3,Pfam_domain:PF00170,Gene3D:1.20.5.170,SMART_domains:SM00338,Superfamily_domains:SSF57959	ENSMUSP00000146789	2021-03-05		1		ENSMUST00000208446.1:c.545G>T	ENSMUSP00000146789.1:p.Arg182Leu	MODERATE			tolerated(0.16)	-1	P13346
Rgma	Het	25_Het	chr7	73409520	C	A	42	96	35	7	96	0	SNP	2	S,M	16.6667	0	ENSMUSG00000070509	ENSMUST00000094312	Transcript	stop_gained	p.Ser140*	-	774	419	140	S/*	tCg/tAg	-	mm10	P2	protein_coding	YES	CCDS21362.2		hmmpanther:PTHR31428:SF4,hmmpanther:PTHR31428,Pfam_domain:PF06535	ENSMUSP00000091870	2021-03-04		1		ENSMUST00000094312.11:c.419C>A	ENSMUSP00000091870.5:p.Ser140Ter	HIGH				1	Q6PCX7
Ctnnb1	Het	25_Het	chr9	120957531	C	A	62	151	54	7	151	0	SNP	2	S,M	11.2903	0	ENSMUSG00000006932	ENSMUST00000154356	Transcript	missense_variant,NMD_transcript_variant	p.His607Asn	-	2031	1819	607	H/N	Cat/Aat	-	mm10	P1	nonsense_mediated_decay	YES	CCDS23630.1		PROSITE_profiles:PS50176,hmmpanther:PTHR23315:SF53,hmmpanther:PTHR23315,Gene3D:1.25.10.10,Pfam_domain:PF00514,SMART_domains:SM00185,Superfamily_domains:SSF48371,Prints_domain:PR01869	ENSMUSP00000125763	2021-12-15		1		ENSMUST00000154356.7:c.1819C>A	ENSMUSP00000125763.1:p.His607Asn	MODERATE				1	Q02248
Smad3	Het	25_Het	chr9	63655559	C	A	68	186	57	11	186	0	SNP	2	S,M	16.1765	0	ENSMUSG00000032402	ENSMUST00000154323	Transcript	missense_variant	p.Arg223Leu	-	711	668	223	R/L	cGa/cTa	-	mm10	P1	protein_coding	YES	CCDS23272.1		PROSITE_profiles:PS51076,hmmpanther:PTHR13703,Pfam_domain:PF03166,Gene3D:2.60.200.10,SMART_domains:SM00524,Superfamily_domains:SSF49879	ENSMUSP00000116790	2021-06-07	cds_end_NF	1		ENSMUST00000154323.7:c.668G>T	ENSMUSP00000116790.1:p.Arg223Leu	MODERATE			deleterious(0.03)	-1	Q8BUN5
Map2k1	Het	25_Het	chr9	64204480	C	A	67	227	58	9	227	0	SNP	2	S,M	13.4328	0	ENSMUSG00000004936	ENSMUST00000005066	Transcript	splice_region_variant,synonymous_variant	p.Val173Val	-	858	519	173	V	gtG/gtT	-	mm10	P1	protein_coding	YES	CCDS23277.1		PROSITE_profiles:PS50011,hmmpanther:PTHR24361:SF370,hmmpanther:PTHR24361,Pfam_domain:PF00069,Gene3D:1.10.510.10,SMART_domains:SM00220,Superfamily_domains:SSF56112	ENSMUSP00000005066	2021-05-11		1		ENSMUST00000005066.8:c.519G>T	ENSMUSP00000005066.8:p.Val173%3D	LOW				-1	P31938
Tmsb4x	Het	25_Het	chrX	167207530	C	A	59	75	50	9	75	0	SNP	2	S,M	15.2542	0	ENSMUSG00000049775	ENSMUST00000112172	Transcript	stop_gained	p.Glu36*	-	331	106	36	E/*	Gaa/Taa	-	mm10	P1	protein_coding	YES	CCDS30529.1		hmmpanther:PTHR12021,hmmpanther:PTHR12021:SF13,Pfam_domain:PF01290,PIRSF_domain:PIRSF001828,Gene3D:1hj0A00,SMART_domains:SM00152,PD005116	ENSMUSP00000107795	2021-03-03		1		ENSMUST00000112172.3:c.106G>T	ENSMUSP00000107795.3:p.Glu36Ter	HIGH				-1	P20065
Xiap	Het	25_Het	chrX	42102178	C	A	70	95	62	8	95	0	SNP	2	S,M	11.4286	0	ENSMUSG00000025860	ENSMUST00000115095	Transcript	missense_variant	p.Gln427Lys	-	1786	1279	427	Q/K	Caa/Aaa	-	mm10	P1	protein_coding	YES	CCDS30098.1		hmmpanther:PTHR10044	ENSMUSP00000110747	2021-06-07		1		ENSMUST00000115095.8:c.1279C>A	ENSMUSP00000110747.2:p.Gln427Lys	MODERATE			tolerated(0.3)	1	Q60989
Bcl6	Het	26_Het	chr16	23972601	A	T	121	253	105	16	251	0	SNP	2	S,M	13.2231	0	ENSMUSG00000022508	ENSMUST00000023151	Transcript	missense_variant	p.Ser334Arg	-	1330	1002	334	S/R	agT/agA	-	mm10	P1	protein_coding	YES	CCDS28082.1			ENSMUSP00000023151	2021-05-10		1		ENSMUST00000023151.5:c.1002T>A	ENSMUSP00000023151.5:p.Ser334Arg	MODERATE			deleterious(0)	-1	P41183
Bcl6	Het	26_Het	chr16	23972648	G	A	117	200	105	12	200	0	SNP	2	S,M	10.2564	0	ENSMUSG00000022508	ENSMUST00000023151	Transcript	missense_variant	p.Pro319Ser	-	1283	955	319	P/S	Ccc/Tcc	-	mm10	P1	protein_coding	YES	CCDS28082.1		hmmpanther:PTHR19303:SF275,hmmpanther:PTHR19303	ENSMUSP00000023151	2021-05-10		1		ENSMUST00000023151.5:c.955C>T	ENSMUSP00000023151.5:p.Pro319Ser	MODERATE			tolerated(0.11)	-1	P41183
Tcf21	Het	27_Het	chr10	22819828	C	A	46	115	38	8	115	0	SNP	2	S,M	17.3913	0	ENSMUSG00000045680	ENSMUST00000218002	Transcript	missense_variant	p.Asp26Tyr	-	332	76	26	D/Y	Gac/Tac	-	mm10	P1	protein_coding	YES	CCDS23732.1		hmmpanther:PTHR23349:SF67,hmmpanther:PTHR23349	ENSMUSP00000151767	2021-01-01		1		ENSMUST00000218002.1:c.76G>T	ENSMUSP00000151767.1:p.Asp26Tyr	MODERATE			deleterious_low_confidence(0.02)	-1	O35437
Sirt1	Het	27_Het	chr10	63326186	C	A	92	325	82	10	323	2	SNP	2	S,M	10.8696	0.615385	ENSMUSG00000020063	ENSMUST00000020257	Transcript	stop_gained,splice_region_variant	p.Glu307*	-	981	919	307	E/*	Gaa/Taa	-	mm10	P3	protein_coding		CCDS23898.1		PROSITE_profiles:PS50305,hmmpanther:PTHR11085:SF15,hmmpanther:PTHR11085,Gene3D:3.30.1600.10,Pfam_domain:PF02146,Superfamily_domains:SSF52467	ENSMUSP00000020257	2021-05-09		1		ENSMUST00000020257.12:c.919G>T	ENSMUSP00000020257.6:p.Glu307Ter	HIGH				-1	Q923E4
Ctnna3	Het	27_Het	chr10	64945987	C	A	107	346	96	11	346	0	SNP	2	S,M	10.2804	0	ENSMUSG00000060843	ENSMUST00000075099	Transcript	stop_gained	p.Ser743*	-	2228	2228	743	S/*	tCa/tAa	-	mm10	P1	protein_coding		CCDS23901.1		hmmpanther:PTHR18914,hmmpanther:PTHR18914:SF21,Gene3D:1.20.120.230,Pfam_domain:PF01044,Superfamily_domains:SSF47220	ENSMUSP00000074606	15/17		1		ENSMUST00000075099.4:c.2228C>A	ENSMUSP00000074606.4:p.Ser743Ter	HIGH				1	Q65CL1
Brca1	Het	27_Het	chr11	101523580	C	A	76	204	66	10	203	1	SNP	2	S,M	13.1579	0.490196	ENSMUSG00000017146	ENSMUST00000017290	Transcript	stop_gained	p.Glu1243*	-	3857	3727	1243	E/*	Gag/Tag	-	mm10	P1	protein_coding	YES	CCDS25474.1		hmmpanther:PTHR13763,hmmpanther:PTHR13763:SF0,PIRSF_domain:PIRSF001734	ENSMUSP00000017290	2021-10-23		1		ENSMUST00000017290.10:c.3727G>T	ENSMUSP00000017290.4:p.Glu1243Ter	HIGH				-1	P48754
Aatk	Het	27_Het	chr11	120011747	G	T	54	136	47	7	136	0	SNP	2	S,M	12.963	0	ENSMUSG00000025375	ENSMUST00000103020	Transcript	missense_variant	p.His551Asn	-	2300	1651	551	H/N	Cat/Aat	-	mm10	P3	protein_coding	YES	CCDS25725.1	4965	hmmpanther:PTHR24417:SF0,hmmpanther:PTHR24417	ENSMUSP00000099309	2021-11-14		1		ENSMUST00000103020.7:c.1651C>A	ENSMUSP00000099309.1:p.His551Asn	MODERATE			tolerated(0.06)	-1	Q8BKX1
Rel	Het	27_Het	chr11	23748805	C	A	89	288	79	10	288	0	SNP	2	S,M	11.236	0	ENSMUSG00000020275	ENSMUST00000102864	Transcript	missense_variant	p.Gly161Cys	-	762	481	161	G/C	Ggt/Tgt	-	mm10	P1	protein_coding	YES	CCDS24480.1		Gene3D:2.60.40.340,Pfam_domain:PF00554,PROSITE_profiles:PS50254,hmmpanther:PTHR24169,hmmpanther:PTHR24169:SF4,Superfamily_domains:SSF49417	ENSMUSP00000099928	2021-05-10		1		ENSMUST00000102864.4:c.481G>T	ENSMUSP00000099928.3:p.Gly161Cys	MODERATE			deleterious(0)	-1
Canx	Het	27_Het	chr11	50299221	C	A	103	313	92	11	312	1	SNP	2	S,M	10.6796	0.319489	ENSMUSG00000020368	ENSMUST00000179865	Transcript	missense_variant	p.Asp437Tyr	-	1493	1309	437	D/Y	Gac/Tac	-	mm10	P1	protein_coding	YES	CCDS24633.1		hmmpanther:PTHR11073:SF11,hmmpanther:PTHR11073,Pfam_domain:PF00262,Superfamily_domains:SSF49899,Prints_domain:PR00626	ENSMUSP00000137440	2021-11-15		1		ENSMUST00000179865.7:c.1309G>T	ENSMUSP00000137440.1:p.Asp437Tyr	MODERATE			deleterious(0)	-1	P35564
Aebp1	Het	27_Het	chr11	5869104	C	A	52	104	44	8	104	0	SNP	2	S,M	15.3846	0	ENSMUSG00000020473	ENSMUST00000109829	Transcript	missense_variant	p.Arg197Ser	-	644	589	197	R/S	Cgc/Agc	-	mm10	A2	protein_coding	YES	CCDS24406.1	3076	hmmpanther:PTHR11532:SF48,hmmpanther:PTHR11532,Gene3D:3.40.630.10,Pfam_domain:PF00246,SMART_domains:SM00631,Superfamily_domains:SSF53187	ENSMUSP00000105454	2021-06-12		1		ENSMUST00000109829.1:c.589C>A	ENSMUSP00000105454.1:p.Arg197Ser	MODERATE			deleterious(0.02)	1	Q640N1
Car4	Het	27_Het	chr11	84964608	C	A	97	188	84	12	188	0	SNP	2	S,M	12.3711	0	ENSMUSG00000000805	ENSMUST00000103194	Transcript	splice_region_variant,intron_variant	-	-	-	-	-	-	-	-	mm10	P1	protein_coding	YES	CCDS25190.1			ENSMUSP00000099483			1		ENSMUST00000103194.9:c.559+7C>A		LOW	2021-06-07			1	Q64444
Col1a1	Het	27_Het	chr11	94949732	G	T	86	313	76	10	312	1	SNP	2	S,M	11.6279	0.319489	ENSMUSG00000001506	ENSMUST00000001547	Transcript	stop_gained	p.Glu1117*	-	3494	3349	1117	E/*	Gaa/Taa	-	mm10	P1	protein_coding	YES	CCDS25265.1		Pfam_domain:PF01391,hmmpanther:PTHR24023,hmmpanther:PTHR24023:SF569,Low_complexity_(Seg):seg	ENSMUSP00000001547	46/51		1		ENSMUST00000001547.7:c.3349G>T	ENSMUSP00000001547.7:p.Glu1117Ter	HIGH				1	P11087
Jag2	Het	27_Het	chr12	112920312	C	A	104	227	92	12	226	0	SNP	2	S,M	11.5385	0	ENSMUSG00000002799	ENSMUST00000075827	Transcript	missense_variant	p.Asp216Tyr	-	657	646	216	D/Y	Gac/Tac	-	mm10	P1	protein_coding	YES	CCDS26200.1		Pfam_domain:PF01414,PROSITE_profiles:PS51051,hmmpanther:PTHR24044,hmmpanther:PTHR24044:SF316,SMART_domains:SM00051	ENSMUSP00000075224	2021-04-26		1		ENSMUST00000075827.3:c.646G>T	ENSMUSP00000075224.3:p.Asp216Tyr	MODERATE			deleterious(0)	-1	Q9QYE5
Dld	Het	27_Het	chr12	31335466	G	T	84	350	74	10	349	0	SNP	2	S,M	11.9048	0	ENSMUSG00000020664	ENSMUST00000110857	Transcript	missense_variant,splice_region_variant	p.Ser292Tyr	-	989	875	292	S/Y	tCt/tAt	-	mm10	P1	protein_coding	YES	CCDS36428.1		Gene3D:3.50.50.60,Pfam_domain:PF07992,PIRSF_domain:PIRSF000350,hmmpanther:PTHR22912,hmmpanther:PTHR22912:SF151,Superfamily_domains:SSF51905,TIGRFAM_domain:TIGR01350	ENSMUSP00000106481	2021-09-14		1		ENSMUST00000110857.4:c.875C>A	ENSMUSP00000106481.3:p.Ser292Tyr	MODERATE			deleterious(0.02)	-1	O08749
Tgfb3	Het	27_Het	chr12	86077609	G	T	78	168	70	8	168	0	SNP	2	S,M	10.2564	0	ENSMUSG00000021253	ENSMUST00000003687	Transcript	missense_variant	p.Phe108Leu	-	1433	324	108	F/L	ttC/ttA	-	mm10	P1	protein_coding	YES	CCDS49116.1		Pfam_domain:PF00688,PIRSF_domain:PIRSF001787,Prints_domain:PR01426,hmmpanther:PTHR11848,hmmpanther:PTHR11848:SF34	ENSMUSP00000003687	2021-01-07		1		ENSMUST00000003687.6:c.324C>A	ENSMUSP00000003687.6:p.Phe108Leu	MODERATE			tolerated(0.24)	-1
Ipo11	Het	27_Het	chr13	106870784	C	A	108	355	97	11	355	0	SNP	2	S,M	10.1852	0	ENSMUSG00000042590	ENSMUST00000186033	Transcript	missense_variant	p.Arg596Leu	-	1787	1787	596	R/L	cGa/cTa	-	mm10	P1	protein_coding	YES	CCDS36776.1		Gene3D:1.25.10.10,hmmpanther:PTHR10997,hmmpanther:PTHR10997:SF7,Superfamily_domains:SSF48371	ENSMUSP00000140046	19/30		1		ENSMUST00000186033.6:c.1787G>T	ENSMUSP00000140046.1:p.Arg596Leu	MODERATE			tolerated(0.06)	-1	Q8K2V6
Prl4a1	Het	27_Het	chr13	28020250	C	A	70	260	61	9	260	0	SNP	2	S,M	12.8571	0	ENSMUSG00000005891	ENSMUST00000021779	Transcript	missense_variant	p.Leu92Ile	-	335	274	92	L/I	Ctc/Atc	-	mm10	P1	protein_coding	YES	CCDS26409.1		Gene3D:1.20.1250.10,Pfam_domain:PF00103,Prints_domain:PR00836,PROSITE_patterns:PS00266,hmmpanther:PTHR11417,hmmpanther:PTHR11417:SF11,Superfamily_domains:SSF47266	ENSMUSP00000021779	2021-03-05		1		ENSMUST00000021779.6:c.274C>A	ENSMUSP00000021779.6:p.Leu92Ile	MODERATE			tolerated(0.2)	1	O35256
Sema4d	Het	27_Het	chr13	51702914	C	A	73	150	64	8	150	0	SNP	2	S,M	10.9589	0	ENSMUSG00000021451	ENSMUST00000021900	Transcript	stop_gained	p.Gly761*	-	2814	2281	761	G/*	Gga/Tga	-	mm10	P1	protein_coding	YES	CCDS26514.1		hmmpanther:PTHR11036:SF18,hmmpanther:PTHR11036	ENSMUSP00000021900	16/16		1		ENSMUST00000021900.13:c.2281G>T	ENSMUSP00000021900.7:p.Gly761Ter	HIGH				-1	O09126
Agtpbp1	Het	27_Het	chr13	59528442	C	A	69	180	61	8	180	0	SNP	2	S,M	11.5942	0	ENSMUSG00000021557	ENSMUST00000171606	Transcript	missense_variant	p.Gln171His	-	743	513	171	Q/H	caG/caT	-	mm10	P1	protein_coding	YES	CCDS36687.1		Gene3D:1.25.10.10,Superfamily_domains:SSF48371	ENSMUSP00000132697	2021-07-18		1		ENSMUST00000171606.7:c.513G>T	ENSMUSP00000132697.1:p.Gln171His	MODERATE			tolerated(0.31)	-1	Q641K1
Edil3	Het	27_Het	chr13	89184784	C	A	54	175	47	7	174	1	SNP	2	S,M	12.963	0.571429	ENSMUSG00000034488	ENSMUST00000118731	Transcript	missense_variant	p.Pro353Gln	-	1568	1058	353	P/Q	cCa/cAa	-	mm10	P1	protein_coding	YES	CCDS26669.1		Gene3D:2.60.120.260,PROSITE_profiles:PS50022,hmmpanther:PTHR10127,hmmpanther:PTHR10127:SF29,Superfamily_domains:SSF49785	ENSMUSP00000112829	2021-09-10		1		ENSMUST00000118731.7:c.1058C>A	ENSMUSP00000112829.1:p.Pro353Gln	MODERATE			deleterious(0)	1	O35474
Vcan	Het	27_Het	chr13	89657532	C	A	104	420	91	13	419	1	SNP	2	S,M	12.5	0.238095	ENSMUSG00000021614	ENSMUST00000160740	Transcript	missense_variant	p.Trp116Leu	-	346	347	116	W/L	tGg/tTg	-	mm10	P1	protein_coding	YES	CCDS49323.1		Gene3D:2.10.70.10,Pfam_domain:PF00084,PROSITE_profiles:PS50923,hmmpanther:PTHR22804,hmmpanther:PTHR22804:SF6,SMART_domains:SM00032,Superfamily_domains:SSF57535	ENSMUSP00000125694	2021-03-03	cds_start_NF	1		ENSMUST00000160740.7:c.346G>T	ENSMUSP00000125694.1:p.Trp116Leu	MODERATE			deleterious_low_confidence(0)	-1
Mycbp2	Het	27_Het	chr14	103120605	C	A	105	293	94	11	292	1	SNP	2	S,M	10.4762	0.341297	ENSMUSG00000033004	ENSMUST00000161008	Transcript	missense_variant	p.Lys1301Asn	-	3901	3903	1301	K/N	aaG/aaT	-	mm10	A2	protein_coding	YES	CCDS49559.1			ENSMUSP00000124443	25/28	cds_start_NF	1		ENSMUST00000161008.7:c.3901G>T	ENSMUSP00000124443.1:p.Lys1301Asn	MODERATE			deleterious(0.01)	-1
Oit1	Het	27_Het	chr14	8361473	C	A	96	219	85	10	216	2	SNP	2	S,M	10.4167	0.913242	ENSMUSG00000021749	ENSMUST00000022269	Transcript	splice_region_variant,intron_variant	-	-	-	-	-	-	-	-	mm10	P1	protein_coding	YES	CCDS36802.1			ENSMUSP00000022269			1		ENSMUST00000022269.5:c.142+3G>T		LOW	2021-04-09			-1	P97805
Zhx2	Het	27_Het	chr15	57822156	G	T	53	125	46	7	125	0	SNP	2	S,M	13.2075	0	ENSMUSG00000071757	ENSMUST00000096430	Transcript	missense_variant	p.Arg307Leu	-	1539	920	307	R/L	cGa/cTa	-	mm10	P1	protein_coding	YES	CCDS27483.1		hmmpanther:PTHR15467,hmmpanther:PTHR15467:SF5,Gene3D:1.10.10.60,SMART_domains:SM00389,Superfamily_domains:SSF46689	ENSMUSP00000094164	2021-03-04		1		ENSMUST00000096430.10:c.920G>T	ENSMUSP00000094164.4:p.Arg307Leu	MODERATE			deleterious(0.01)	1	Q8C0C0
Mtss1	Het	27_Het	chr15	58943699	C	A	60	197	53	7	196	0	SNP	2	S,M	11.6667	0	ENSMUSG00000022353	ENSMUST00000080371	Transcript	missense_variant	p.Gly671Cys	-	2510	2011	671	G/C	Ggc/Tgc	-	mm10	P1	protein_coding	YES	CCDS27496.1	4210	hmmpanther:PTHR15708,hmmpanther:PTHR15708:SF10	ENSMUSP00000079239	15/15		1		ENSMUST00000080371.6:c.2011G>T	ENSMUSP00000079239.6:p.Gly671Cys	MODERATE			deleterious(0.02)	-1	Q9CQJ8
Gsdmd	Het	27_Het	chr15	75866179	C	A	85	169	76	9	169	0	SNP	2	S,M	10.5882	0	ENSMUSG00000022575	ENSMUST00000023238	Transcript	splice_region_variant,intron_variant	-	-	-	-	-	-	-	-	mm10	P1	protein_coding	YES	CCDS27551.1			ENSMUSP00000023238			1		ENSMUST00000023238.4:c.826+3C>A		LOW	2021-07-10			1	Q9D8T2
Cby1	Het	27_Het	chr15	79661499	C	A	74	176	64	9	175	0	SNP	2	S,M	12.1622	0	ENSMUSG00000022428	ENSMUST00000023064	Transcript	stop_gained	p.Ser18*	-	196	53	18	S/*	tCg/tAg	-	mm10	P1	protein_coding	YES	CCDS27645.1		Pfam_domain:PF14645,hmmpanther:PTHR21533,hmmpanther:PTHR21533:SF20	ENSMUSP00000023064	2021-02-05		1		ENSMUST00000023064.7:c.53C>A	ENSMUSP00000023064.7:p.Ser18Ter	HIGH				1	Q9D1C2
Ptprt	Het	27_Het	chr2	161558813	G	T	28	92	22	6	92	0	SNP	2	S,V	21.4286	0	ENSMUSG00000053141	ENSMUST00000109441	Transcript	splice_region_variant,intron_variant	-	-	-	-	-	-	-	-	mm10	A2	protein_coding	YES	CCDS71182.1			ENSMUSP00000105067			1		ENSMUST00000109441.1:c.3296+7C>A		LOW	23/30			-1	Q99M80
Cacna1s	Het	29_Het	chr1	136098164	C	A	72	220	64	8	220	0	SNP	2	S,M	11.1111	0	ENSMUSG00000026407	ENSMUST00000112064	Transcript	splice_region_variant,intron_variant	-	-	-	-	-	-	-	-	mm10	P3	protein_coding	YES	CCDS35724.1			ENSMUSP00000107695			1		ENSMUST00000112064.7:c.3054-8C>A		LOW	24/43			1
Tnn	Het	29_Het	chr1	160110238	C	A	68	143	59	9	143	0	SNP	2	S,M	13.2353	0	ENSMUSG00000026725	ENSMUST00000039178	Transcript	splice_region_variant,intron_variant	-	-	-	-	-	-	-	-	mm10	P2	protein_coding	YES	CCDS15404.1			ENSMUSP00000039452					ENSMUST00000039178.11:c.3700+8G>T		LOW	15/21			-1	Q80Z71
Itga2b	Het	29_Het	chr11	102461652	C	A	96	205	86	10	205	0	SNP	2	S,M	10.4167	0	ENSMUSG00000034664	ENSMUST00000103086	Transcript	missense_variant	p.Asp459Tyr	-	1546	1375	459	D/Y	Gac/Tac	-	mm10	P1	protein_coding	YES	CCDS25500.1		Gene3D:3nigC00,Prints_domain:PR01185,PROSITE_profiles:PS51470,hmmpanther:PTHR23220,hmmpanther:PTHR23220:SF73,SMART_domains:SM00191,Superfamily_domains:SSF69318	ENSMUSP00000099375	13/30		1		ENSMUST00000103086.3:c.1375G>T	ENSMUSP00000099375.3:p.Asp459Tyr	MODERATE			deleterious(0.02)	-1	Q9QUM0
Srcin1	Het	29_Het	chr11	97551769	G	T	67	104	58	9	104	0	SNP	2	S,M	13.4328	0	ENSMUSG00000038453	ENSMUST00000126287	Transcript	missense_variant	p.Arg112Ser	-	344	334	112	R/S	Cgc/Agc	-	mm10	P2	protein_coding	YES	CCDS36294.1		hmmpanther:PTHR22741:SF5,hmmpanther:PTHR22741	ENSMUSP00000116444	2021-02-07	cds_end_NF	1		ENSMUST00000126287.1:c.334C>A	ENSMUSP00000116444.1:p.Arg112Ser	MODERATE			deleterious(0)	-1
Ncoa1	Het	29_Het	chr12	4297630	C	A	34	92	27	7	92	0	SNP	2	S,M	20.5882	0	ENSMUSG00000020647	ENSMUST00000085814	Transcript	splice_region_variant,intron_variant	-	-	-	-	-	-	-	-	mm10	P2	protein_coding	YES	CCDS25789.1			ENSMUSP00000082971			1		ENSMUST00000085814.4:c.950-7G>T		LOW	2021-10-22			-1	P70365
Rad17	Het	29_Het	chr13	100637001	C	A	35	181	29	6	180	1	SNP	2	S,M	17.1429	0.552486	ENSMUSG00000021635	ENSMUST00000177848	Transcript	missense_variant	p.Trp160Leu	-	651	479	160	W/L	tGg/tTg	-	mm10	P1	protein_coding	YES	CCDS26733.1		Gene3D:3.40.50.300,Pfam_domain:PF03215,hmmpanther:PTHR12172,hmmpanther:PTHR12172:SF3,SMART_domains:SM00382,Superfamily_domains:SSF52540,TIGRFAM_domain:TIGR00602	ENSMUSP00000136292	2021-05-17		1		ENSMUST00000177848.1:c.479G>T	ENSMUSP00000136292.1:p.Trp160Leu	MODERATE			deleterious(0)	-1	Q6NXW6
Mycbp2	Het	29_Het	chr14	103155973	C	A	94	314	83	11	314	0	SNP	2	S,M	11.7021	0	ENSMUSG00000033004	ENSMUST00000159855	Transcript	stop_gained	p.Glu3051*	-	9434	9151	3051	E/*	Gaa/Taa	-	mm10	P2	protein_coding	YES	CCDS49559.1			ENSMUSP00000124710	58/85		1		ENSMUST00000159855.7:c.9151G>T	ENSMUSP00000124710.1:p.Glu3051Ter	HIGH				-1
Rb1	Het	29_Het	chr14	73264356	C	A	46	277	34	12	277	0	SNP	3	S,V,M	26.087	0	ENSMUSG00000022105	ENSMUST00000022701	Transcript	missense_variant	p.Asp473Tyr	-	1598	1417	473	D/Y	Gac/Tac	-	mm10	P1	protein_coding	YES	CCDS27267.1		Gene3D:1.10.472.10,Pfam_domain:PF01858,hmmpanther:PTHR13742,hmmpanther:PTHR13742:SF21,SMART_domains:SM01368,Superfamily_domains:SSF47954	ENSMUSP00000022701	16/27		1		ENSMUST00000022701.6:c.1417G>T	ENSMUSP00000022701.6:p.Asp473Tyr	MODERATE			deleterious(0.01)	-1	P13405
Ndrg1	Het	29_Het	chr15	66938680	C	A	108	268	97	11	268	0	SNP	2	S,M	10.1852	0	ENSMUSG00000005125	ENSMUST00000005256	Transcript	stop_gained	p.Glu240*	-	873	718	240	E/*	Gag/Tag	-	mm10	P1	protein_coding	YES	CCDS37092.1		Gene3D:3.40.50.1820,Pfam_domain:PF03096,hmmpanther:PTHR11034,hmmpanther:PTHR11034:SF18,Superfamily_domains:SSF53474	ENSMUSP00000005256	2021-11-16		1		ENSMUST00000005256.12:c.718G>T	ENSMUSP00000005256.6:p.Glu240Ter	HIGH				-1	Q62433
Smc1b	Het	29_Het	chr15	85069707	C	A	65	270	58	7	270	0	SNP	2	S,M	10.7692	0	ENSMUSG00000022432	ENSMUST00000023068	Transcript	missense_variant	p.Met1120Ile	-	3380	3360	1120	M/I	atG/atT	-	mm10	P1	protein_coding	YES	CCDS27718.1		Gene3D:3.40.50.300,Pfam_domain:PF02463,PIRSF_domain:PIRSF005719,hmmpanther:PTHR18937,hmmpanther:PTHR18937:SF147,Superfamily_domains:SSF52540	ENSMUSP00000023068	22/25		1		ENSMUST00000023068.6:c.3360G>T	ENSMUSP00000023068.6:p.Met1120Ile	MODERATE			deleterious(0.01)	-1	Q920F6
Snx29	Het	29_Het	chr16	11656179	C	A	58	196	51	7	196	0	SNP	2	S,M	12.069	0	ENSMUSG00000071669	ENSMUST00000096273	Transcript	stop_gained	p.Ser309*	-	971	926	309	S/*	tCg/tAg	-	mm10		protein_coding		CCDS79422.1		hmmpanther:PTHR24115,hmmpanther:PTHR24115:SF488,Gene3D:3.30.1520.10	ENSMUSP00000093993	2021-10-14		1		ENSMUST00000096273.8:c.926C>A	ENSMUSP00000093993.2:p.Ser309Ter	HIGH				1	Q9D3S3
Arhgap31	Het	29_Het	chr16	38603616	C	A	62	122	53	9	122	0	SNP	2	S,M	14.5161	0	ENSMUSG00000022799	ENSMUST00000023487	Transcript	missense_variant	p.Trp696Leu	-	2688	2087	696	W/L	tGg/tTg	-	mm10	P1	protein_coding	YES	CCDS28172.1		hmmpanther:PTHR15729,hmmpanther:PTHR15729:SF3	ENSMUSP00000023487	2021-12-12				ENSMUST00000023487.4:c.2087G>T	ENSMUSP00000023487.4:p.Trp696Leu	MODERATE			tolerated_low_confidence(0.22)	-1	A6X8Z5
Tsc2	Het	29_Het	chr17	24599783	C	A	69	176	62	7	176	0	SNP	2	S,M	10.1449	0	ENSMUSG00000002496	ENSMUST00000097373	Transcript	missense_variant	p.Gly1361Trp	-	4202	4081	1361	G/W	Ggg/Tgg	-	mm10	P1	protein_coding	YES	CCDS28486.1	3269	hmmpanther:PTHR10063,hmmpanther:PTHR10063:SF1	ENSMUSP00000094986	32/40		1		ENSMUST00000097373.1:c.4081G>T	ENSMUSP00000094986.1:p.Gly1361Trp	MODERATE			deleterious(0)	-1	O08852
Elp2	Het	29_Het	chr18	24616010	C	A	105	354	93	12	352	1	SNP	2	S,M	11.4286	0.282486	ENSMUSG00000024271	ENSMUST00000025120	Transcript	missense_variant	p.Phe259Leu	-	811	777	259	F/L	ttC/ttA	-	mm10	P1	protein_coding	YES	CCDS29103.1		PROSITE_profiles:PS50294,hmmpanther:PTHR22847,hmmpanther:PTHR22847:SF471	ENSMUSP00000025120	2021-08-22				ENSMUST00000025120.6:c.777C>A	ENSMUSP00000025120.6:p.Phe259Leu	MODERATE			tolerated(0.07)	1	Q91WG4
Synpo	Het	29_Het	chr18	60603789	C	A	95	173	85	10	172	0	SNP	2	S,M	10.5263	0	ENSMUSG00000043079	ENSMUST00000155195	Transcript	missense_variant	p.Asp123Tyr	-	859	367	123	D/Y	Gat/Tat	-	mm10	A2	protein_coding	YES	CCDS50298.1		hmmpanther:PTHR24217,hmmpanther:PTHR24217:SF13	ENSMUSP00000117897	2021-03-03		1		ENSMUST00000155195.2:c.367G>T	ENSMUSP00000117897.2:p.Asp123Tyr	MODERATE			deleterious_low_confidence(0)	-1	Q8CC35
Pip5k1b	Het	29_Het	chr19	24397011	C	A	126	344	112	14	344	0	SNP	2	S,M	11.1111	0	ENSMUSG00000024867	ENSMUST00000025800	Transcript	splice_region_variant,intron_variant	-	-	-	-	-	-	-	-	mm10	P1	protein_coding	YES	CCDS37940.1			ENSMUSP00000025800			1		ENSMUST00000025800.14:c.200+5G>T		LOW	2021-04-14			-1	P70181
Trp53bp1	Het	29_Het	chr2	121216002	C	A	20	68	15	5	68	0	SNP	2	V,M	25	0	ENSMUSG00000043909	ENSMUST00000110647	Transcript	stop_gained	p.Glu1106*	-	3379	3316	1106	E/*	Gag/Tag	-	mm10	A2	protein_coding		CCDS71125.1		Low_complexity_(Seg):seg,hmmpanther:PTHR15321,hmmpanther:PTHR15321:SF3	ENSMUSP00000106277	17/27		1		ENSMUST00000110647.7:c.3316G>T	ENSMUSP00000106277.1:p.Glu1106Ter	HIGH				-1
Cd82	Het	29_Het	chr2	93420290	C	A	96	183	85	11	183	0	SNP	2	S,M	11.4583	0	ENSMUSG00000027215	ENSMUST00000028644	Transcript	stop_gained	p.Glu225*	-	942	673	225	E/*	Gag/Tag	-	mm10	P1	protein_coding	YES	CCDS16454.1		Superfamily_domains:0037997,Pfam_domain:PF00335,PIRSF_domain:PIRSF002419,hmmpanther:PTHR19282,hmmpanther:PTHR19282:SF44	ENSMUSP00000028644	2021-09-10				ENSMUST00000028644.10:c.673G>T	ENSMUSP00000028644.4:p.Glu225Ter	HIGH				-1	P40237
Ephb2	Het	29_Het	chr4	136660675	C	A	72	179	64	8	179	0	SNP	2	S,M	11.1111	0	ENSMUSG00000028664	ENSMUST00000059287	Transcript	stop_gained	p.Gly706*	-	2242	2116	706	G/*	Gga/Tga	-	mm10	A2	protein_coding	YES	CCDS71498.1		PROSITE_profiles:PS50011,hmmpanther:PTHR24416:SF123,hmmpanther:PTHR24416,Gene3D:1.10.510.10,Pfam_domain:PF07714,PIRSF_domain:PIRSF000666,SMART_domains:SM00219,Superfamily_domains:SSF56112,Prints_domain:PR00109	ENSMUSP00000058135	2021-11-16		1		ENSMUST00000059287.13:c.2116G>T	ENSMUSP00000058135.7:p.Gly706Ter	HIGH				-1	P54763
Pik3cd	Het	29_Het	chr4	149659018	C	A	38	100	32	6	99	0	SNP	2	S,M	15.7895	0	ENSMUSG00000039936	ENSMUST00000177654	Transcript	missense_variant	p.Gly245Trp	-	884	733	245	G/W	Ggg/Tgg	-	mm10	P4	protein_coding	YES	CCDS51384.1		PROSITE_profiles:PS51546,hmmpanther:PTHR10048:SF35,hmmpanther:PTHR10048,Pfam_domain:PF00794,Gene3D:3.10.20.90,SMART_domains:SM00144,Superfamily_domains:SSF54236	ENSMUSP00000136045	2021-05-23		1		ENSMUST00000177654.7:c.733G>T	ENSMUSP00000136045.1:p.Gly245Trp	MODERATE			deleterious(0)	-1	O35904
Lyn	Het	29_Het	chr4	3789764	G	T	55	98	47	8	98	0	SNP	2	S,M	14.5455	0	ENSMUSG00000042228	ENSMUST00000103010	Transcript	missense_variant	p.Met432Ile	-	1539	1296	432	M/I	atG/atT	-	mm10	P3	protein_coding	YES	CCDS17939.1		PROSITE_profiles:PS50011,hmmpanther:PTHR24418,hmmpanther:PTHR24418:SF42,Gene3D:1.10.510.10,Pfam_domain:PF07714,SMART_domains:SM00219,Superfamily_domains:SSF56112	ENSMUSP00000100075	13/13		1		ENSMUST00000103010.3:c.1296G>T	ENSMUSP00000100075.3:p.Met432Ile	MODERATE			tolerated(1)	1	P25911
Plaa	Het	29_Het	chr4	94586920	C	A	58	296	50	7	296	0	SNP	2	S,M	12.069	0	ENSMUSG00000028577	ENSMUST00000107107	Transcript	missense_variant,splice_region_variant	p.Gly189Val	-	785	566	189	G/V	gGg/gTg	-	mm10	P1	protein_coding	YES	CCDS18359.1		Gene3D:2.130.10.10,Pfam_domain:PF00400,PROSITE_profiles:PS50294,hmmpanther:PTHR19849,hmmpanther:PTHR19849:SF0,SMART_domains:SM00320,Superfamily_domains:SSF50978	ENSMUSP00000102724	2021-05-14				ENSMUST00000107107.8:c.566G>T	ENSMUSP00000102724.2:p.Gly189Val	MODERATE			deleterious(0)	-1	P27612
Dock7	Het	29_Het	chr4	99083097	C	A	37	184	30	7	184	0	SNP	2	S,M	18.9189	0	ENSMUSG00000028556	ENSMUST00000205650	Transcript	missense_variant	p.Arg77Leu	-	230	230	77	R/L	cGg/cTg	-	mm10	P3	protein_coding	YES	CCDS38816.1		hmmpanther:PTHR23317:SF78,hmmpanther:PTHR23317,Pfam_domain:PF11878	ENSMUSP00000145604	1948-03-01		1		ENSMUST00000205650.1:c.230G>T	ENSMUSP00000145604.1:p.Arg77Leu	MODERATE			tolerated(0.06)	-1
Ncf1	Het	29_Het	chr5	134229525	C	A	68	153	61	7	153	0	SNP	2	S,M	10.2941	0	ENSMUSG00000015950	ENSMUST00000016094	Transcript	stop_gained	p.Glu15*	-	101	43	15	E/*	Gag/Tag	-	mm10		protein_coding	YES	CCDS71674.1		Gene3D:3.30.1520.10,Pfam_domain:PF00787,Prints_domain:PR00498,PROSITE_profiles:PS50195,hmmpanther:PTHR15706,SMART_domains:SM00312,Superfamily_domains:SSF64268	ENSMUSP00000016094	2021-01-11		1		ENSMUST00000016094.12:c.43G>T	ENSMUSP00000016094.6:p.Glu15Ter	HIGH				-1
Brca2	Het	29_Het	chr5	150560515	C	A	116	431	104	12	431	0	SNP	2	S,M	10.3448	0	ENSMUSG00000041147	ENSMUST00000044620	Transcript	stop_gained	p.Ser2933*	-	9297	8798	2933	S/*	tCa/tAa	-	mm10	P1	protein_coding	YES	CCDS39411.1		hmmpanther:PTHR11289,hmmpanther:PTHR11289:SF0,Gene3D:2.40.50.140,PIRSF_domain:PIRSF002397,Superfamily_domains:SSF50249	ENSMUSP00000038576	23/27		1		ENSMUST00000044620.10:c.8798C>A	ENSMUSP00000038576.7:p.Ser2933Ter	HIGH				1	P97929
Tlr1	Het	29_Het	chr5	64926338	C	A	114	364	102	12	364	0	SNP	2	S,M	10.5263	0	ENSMUSG00000044827	ENSMUST00000197315	Transcript	missense_variant	p.Asp299Tyr	-	1366	895	299	D/Y	Gac/Tac	-	mm10	P1	protein_coding	YES	CCDS19302.1		hmmpanther:PTHR24365:SF261,hmmpanther:PTHR24365,PIRSF_domain:PIRSF037595	ENSMUSP00000142500	2021-04-04		1		ENSMUST00000197315.4:c.895G>T	ENSMUSP00000142500.1:p.Asp299Tyr	MODERATE			tolerated(0.07)	-1	Q9EPQ1
Vhl	Het	29_Het	chr6	113624232	C	A	24	68	18	6	68	0	SNP	2	S,V	25	0	ENSMUSG00000033933	ENSMUST00000035673	Transcript	stop_gained	p.Ser31*	-	274	92	31	S/*	tCg/tAg	-	mm10	P1	protein_coding	YES	CCDS20429.1		Superfamily_domains:0040561,Gene3D:1lm8V02,Pfam_domain:PF01847,hmmpanther:PTHR15160,hmmpanther:PTHR15160:SF5	ENSMUSP00000039418	2021-01-03		1		ENSMUST00000035673.7:c.92C>A	ENSMUSP00000039418.7:p.Ser31Ter	HIGH				1	P40338
Cadps2	Het	29_Het	chr6	23344210	C	A	124	356	110	13	356	0	SNP	2	S,M	10.4839	0	ENSMUSG00000017978	ENSMUST00000166458	Transcript	missense_variant	p.Asp894Tyr	-	2680	2680	894	D/Y	Gac/Tac	-	mm10	A1	protein_coding	YES	CCDS57411.1		PROSITE_profiles:PS51258,hmmpanther:PTHR12166:SF7,hmmpanther:PTHR12166	ENSMUSP00000125972	20/30	cds_start_NF	1		ENSMUST00000166458.8:c.2680G>T	ENSMUSP00000125972.2:p.Asp894Tyr	MODERATE			deleterious(0)	-1	Q8BYR5
Nod1	Het	29_Het	chr6	54934421	C	A	78	234	68	10	232	2	SNP	2	S,M	12.8205	0.854701	ENSMUSG00000038058	ENSMUST00000203076	Transcript	missense_variant	p.Lys183Asn	-	549	549	183	K/N	aaG/aaT	-	mm10	P1	protein_coding	YES	CCDS20160.1		hmmpanther:PTHR24106,hmmpanther:PTHR24106:SF18,Gene3D:3.80.10.10,SMART_domains:SM00368,Superfamily_domains:SSF52047	ENSMUSP00000145123	2021-04-07	cds_start_NF,cds_end_NF	1		ENSMUST00000203076.1:c.549G>T	ENSMUSP00000145123.1:p.Lys183Asn	MODERATE			tolerated(0.08)	-1	Q8BHB0
Smyd1	Het	29_Het	chr6	71237493	C	A	55	145	48	7	145	0	SNP	2	S,M	12.7273	0	ENSMUSG00000055027	ENSMUST00000074301	Transcript	splice_region_variant,intron_variant	-	-	-	-	-	-	-	-	mm10	P1	protein_coding	YES	CCDS51805.1			ENSMUSP00000073911			1		ENSMUST00000074301.9:c.529-6G>T		LOW	2021-03-09			-1	P97443
Adamts9	Het	29_Het	chr6	92858083	C	A	87	274	78	9	274	0	SNP	2	S,M	10.3448	0	ENSMUSG00000030022	ENSMUST00000167391	Transcript	missense_variant	p.Asp689Tyr	-	2165	2065	689	D/Y	Gac/Tac	-	mm10	P1	protein_coding	YES	CCDS51855.1		PROSITE_profiles:PS50092,hmmpanther:PTHR13723:SF33,hmmpanther:PTHR13723,Gene3D:2.20.100.10,Pfam_domain:PF00090,SMART_domains:SM00209,Superfamily_domains:SSF82895	ENSMUSP00000126498	16/30		1		ENSMUST00000167391.1:c.2065G>T	ENSMUSP00000126498.1:p.Asp689Tyr	MODERATE			deleterious(0.02)	-1
C2cd3	Het	29_Het	chr7	100455388	C	A	79	207	71	8	206	1	SNP	2	S,M	10.1266	0.483092	ENSMUSG00000047248	ENSMUST00000051777	Transcript	missense_variant	p.Leu2203Ile	-	6816	6607	2203	L/I	Cta/Ata	-	mm10	P2	protein_coding	YES	CCDS57568.1		hmmpanther:PTHR21254:SF1,hmmpanther:PTHR21254	ENSMUSP00000062637	31/33		1		ENSMUST00000051777.14:c.6607C>A	ENSMUSP00000062637.7:p.Leu2203Ile	MODERATE			tolerated(0.19)	1	Q52KB6
Itgam	Het	29_Het	chr7	128107973	C	A	50	193	43	7	193	0	SNP	2	S,M	14	0	ENSMUSG00000030786	ENSMUST00000120355	Transcript	missense_variant	p.Arg659Ser	-	2039	1975	659	R/S	Cgc/Agc	-	mm10	P3	protein_coding	YES	CCDS21889.1		Gene3D:1jv2A02,Pfam_domain:PF08441,hmmpanther:PTHR23220,hmmpanther:PTHR23220:SF76,Superfamily_domains:SSF69179	ENSMUSP00000113957	16/29		1		ENSMUST00000120355.7:c.1975C>A	ENSMUSP00000113957.1:p.Arg659Ser	MODERATE			tolerated(0.41)	1
Tial1	Het	29_Het	chr7	128445733	C	A	88	401	78	10	400	0	SNP	2	S,M	11.3636	0	ENSMUSG00000030846	ENSMUST00000165023	Transcript	missense_variant	p.Met158Ile	-	611	474	158	M/I	atG/atT	-	mm10	P1	protein_coding	YES	CCDS21897.1		PROSITE_profiles:PS50102,hmmpanther:PTHR24012,hmmpanther:PTHR24012:SF450,Gene3D:3.30.70.330,Pfam_domain:PF00076,SMART_domains:SM00360,SMART_domains:SM00361,Superfamily_domains:SSF54928	ENSMUSP00000126458	2021-08-13		1		ENSMUST00000165023.7:c.474G>T	ENSMUSP00000126458.1:p.Met158Ile	MODERATE			deleterious(0.02)	-1	P70318
Pou2f2	Het	29_Het	chr7	25093621	C	A	44	117	36	8	116	0	SNP	2	S,M	18.1818	0	ENSMUSG00000008496	ENSMUST00000176408	Transcript	missense_variant	p.Gly422Trp	-	1324	1264	422	G/W	Ggg/Tgg	-	mm10	A2	protein_coding	YES	CCDS52143.1		Low_complexity_(Seg):seg,hmmpanther:PTHR11636:SF46,hmmpanther:PTHR11636	ENSMUSP00000135326	13/13		1		ENSMUST00000176408.7:c.1264G>T	ENSMUSP00000135326.1:p.Gly422Trp	MODERATE			deleterious_low_confidence(0)	-1	Q00196
Dpf1	Het	29_Het	chr7	29304103	C	A	66	101	58	8	101	0	SNP	2	S,M	12.1212	0	ENSMUSG00000030584	ENSMUST00000108231	Transcript	missense_variant	p.Pro8Gln	-	153	23	8	P/Q	cCg/cAg	-	mm10	P2	protein_coding	YES	CCDS21071.1		hmmpanther:PTHR10615:SF12,hmmpanther:PTHR10615	ENSMUSP00000103866	2021-01-12				ENSMUST00000108231.7:c.23C>A	ENSMUSP00000103866.1:p.Pro8Gln	MODERATE			tolerated(0.08)	1	Q9QX66
Xab2	Het	29_Het	chr8	3611516	C	A	87	165	76	10	165	0	SNP	2	S,M	11.4943	0	ENSMUSG00000019470	ENSMUST00000019614	Transcript	missense_variant	p.Asp617Tyr	-	1887	1849	617	D/Y	Gac/Tac	-	mm10	P1	protein_coding	YES	CCDS22065.1		hmmpanther:PTHR11246,Superfamily_domains:SSF48452	ENSMUSP00000019614	14/19		1		ENSMUST00000019614.12:c.1849G>T	ENSMUSP00000019614.6:p.Asp617Tyr	MODERATE			deleterious(0)	-1	Q9DCD2
Crlf1	Het	29_Het	chr8	70501009	C	A	38	108	31	7	107	0	SNP	2	S,M	18.4211	0	ENSMUSG00000007888	ENSMUST00000008032	Transcript	missense_variant	p.Arg278Ser	-	951	832	278	R/S	Cgc/Agc	-	mm10	P1	protein_coding	YES	CCDS22369.1		PROSITE_profiles:PS50853,hmmpanther:PTHR23036,hmmpanther:PTHR23036:SF100,Pfam_domain:PF00041,Gene3D:2.60.40.10,SMART_domains:SM00060,Superfamily_domains:SSF49265	ENSMUSP00000008032	2021-05-09		1		ENSMUST00000008032.13:c.832C>A	ENSMUSP00000008032.7:p.Arg278Ser	MODERATE			deleterious(0)	1	Q9JM58
Atm	Het	29_Het	chr9	53458839	C	A	70	300	56	13	300	0	SNP	2	S,M	18.5714	0	ENSMUSG00000034218	ENSMUST00000118282	Transcript	missense_variant	p.Met2324Ile	-	7180	6972	2324	M/I	atG/atT	-	mm10	P1	protein_coding	YES	CCDS40636.1		Pfam_domain:PF02259,PROSITE_profiles:PS51189,hmmpanther:PTHR11139,hmmpanther:PTHR11139:SF72,Superfamily_domains:SSF48371	ENSMUSP00000113388	48/64		1		ENSMUST00000118282.7:c.6972G>T	ENSMUSP00000113388.1:p.Met2324Ile	MODERATE			deleterious(0.04)	-1	Q62388
Csk	Het	29_Het	chr9	57630337	G	T	62	103	54	8	103	0	SNP	2	S,M	12.9032	0	ENSMUSG00000032312	ENSMUST00000217314	Transcript	missense_variant	p.Pro98Gln	-	428	293	98	P/Q	cCa/cAa	-	mm10	P1	protein_coding	YES	CCDS23228.1		PROSITE_profiles:PS50001,hmmpanther:PTHR24418:SF52,hmmpanther:PTHR24418,Pfam_domain:PF00017,Gene3D:3.30.505.10,SMART_domains:SM00252,Superfamily_domains:SSF55550,Superfamily_domains:SSF50044	ENSMUSP00000150984	2021-05-13	cds_end_NF	1		ENSMUST00000217314.1:c.293C>A	ENSMUSP00000150984.1:p.Pro98Gln	MODERATE			deleterious(0.02)	-1	P41241
Smarca1	Het	29_Het	chrX	47876503	C	A	62	159	55	7	158	1	SNP	2	S,M	11.2903	0.628931	ENSMUSG00000031099	ENSMUST00000153548	Transcript	missense_variant	p.Trp282Leu	-	845	845	282	W/L	tGg/tTg	-	mm10	A2	protein_coding	YES	CCDS72374.1		Gene3D:3.40.50.300,Pfam_domain:PF00176,PROSITE_profiles:PS51192,hmmpanther:PTHR10799,hmmpanther:PTHR10799:SF691,SMART_domains:SM00487,Superfamily_domains:SSF52540	ENSMUSP00000114296	2021-07-18	cds_end_NF	1		ENSMUST00000153548.8:c.845G>T	ENSMUSP00000114296.2:p.Trp282Leu	MODERATE			deleterious(0)	-1	Q6PGB8
L1cam	Het	29_Het	chrX	73869788	C	A	66	125	59	7	125	0	SNP	2	S,M	10.6061	0	ENSMUSG00000031391	ENSMUST00000146790	Transcript	missense_variant	p.Arg6Leu	-	337	17	6	R/L	cGg/cTg	-	mm10	A1	protein_coding	YES	CCDS30215.1		hmmpanther:PTHR10489,hmmpanther:PTHR10489:SF593,Cleavage_site_(Signalp):SignalP-noTM	ENSMUSP00000121797	2021-02-05	cds_end_NF	1		ENSMUST00000146790.1:c.17G>T	ENSMUSP00000121797.1:p.Arg6Leu	MODERATE			tolerated(0.52)	-1
Gli2	Het	33_Het	chr1	118844428	C	A	78	206	70	8	206	0	SNP	2	S,M	10.2564	0	ENSMUSG00000048402	ENSMUST00000062483	Transcript	stop_gained	p.Glu516*	-	1895	1546	516	E/*	Gaa/Taa	-	mm10	P1	protein_coding	YES	CCDS35692.1		Gene3D:3.30.160.60,PROSITE_patterns:PS00028,PROSITE_profiles:PS50157,hmmpanther:PTHR19818,hmmpanther:PTHR19818:SF73,SMART_domains:SM00355,Superfamily_domains:SSF57667,Superfamily_domains:SSF57667	ENSMUSP00000054837	2021-11-14		1		ENSMUST00000062483.14:c.1546G>T	ENSMUSP00000054837.8:p.Glu516Ter	HIGH				-1	Q0VGT2
Foxo3	Het	33_Het	chr10	42275004	C	A	57	167	51	6	167	0	SNP	2	S,M	10.5263	0	ENSMUSG00000048756	ENSMUST00000175881	Transcript	missense_variant	p.Gly144Trp	-	713	430	144	G/W	Ggg/Tgg	-	mm10	P1	protein_coding	YES	CCDS23810.1		hmmpanther:PTHR11829,hmmpanther:PTHR11829:SF97,Low_complexity_(Seg):seg	ENSMUSP00000135380	2021-02-03		1		ENSMUST00000175881.7:c.430G>T	ENSMUSP00000135380.1:p.Gly144Trp	MODERATE			deleterious(0.01)	-1	Q9WVH4
Ncoa1	Het	33_Het	chr12	4259233	C	A	106	363	95	11	363	0	SNP	2	S,M	10.3774	0	ENSMUSG00000020647	ENSMUST00000220434	Transcript	missense_variant	p.Met1354Ile	-	4077	4062	1354	M/I	atG/atT	-	mm10	A2	protein_coding	YES	CCDS25789.1		Low_complexity_(Seg):seg,hmmpanther:PTHR10684:SF1,hmmpanther:PTHR10684	ENSMUSP00000151358	17/19	cds_start_NF	1		ENSMUST00000220434.1:c.4062G>T	ENSMUSP00000151358.1:p.Met1354Ile	MODERATE			tolerated(0.06)	-1	P70365
Mycbp2	Het	33_Het	chr14	103208864	C	A	43	179	37	6	179	0	SNP	2	S,M	13.9535	0	ENSMUSG00000033004	ENSMUST00000160758	Transcript	missense_variant	p.Gly1810Trp	-	5428	5428	1810	G/W	Ggg/Tgg	-	mm10	A2	protein_coding	YES	CCDS49559.1		Pfam_domain:PF08005	ENSMUSP00000124601	37/83	cds_start_NF	1		ENSMUST00000160758.7:c.5428G>T	ENSMUSP00000124601.1:p.Gly1810Trp	MODERATE				-1
Ptprm	Het	33_Het	chr17	66744746	C	A	49	244	43	6	243	1	SNP	2	S,M	12.2449	0.409836	ENSMUSG00000033278	ENSMUST00000037974	Transcript	missense_variant	p.Arg964Leu	-	3321	2891	964	R/L	cGa/cTa	-	mm10	P1	protein_coding	YES	CCDS28948.1		Gene3D:3.90.190.10,Pfam_domain:PF00102,PROSITE_profiles:PS50055,hmmpanther:PTHR19134,hmmpanther:PTHR19134:SF206,SMART_domains:SM00194,Superfamily_domains:SSF52799	ENSMUSP00000045603	20/31		1		ENSMUST00000037974.8:c.2891G>T	ENSMUSP00000045603.8:p.Arg964Leu	MODERATE			tolerated(0.06)	-1	P28828
Vav2	Het	33_Het	chr2	27426365	C	A	32	70	26	6	70	0	SNP	2	S,M	18.75	0	ENSMUSG00000009621	ENSMUST00000185188	Transcript	missense_variant,NMD_transcript_variant	p.Asp39Tyr	-	548	115	39	D/Y	Gac/Tac	-	mm10	P1	nonsense_mediated_decay	YES	CCDS15827.1		Gene3D:1.10.418.10,Pfam_domain:PF11971,PROSITE_profiles:PS50021,hmmpanther:PTHR22826,hmmpanther:PTHR22826:SF95,Superfamily_domains:SSF47576	ENSMUSP00000138964	2021-01-30		1		ENSMUST00000185188.7:c.115G>T	ENSMUSP00000138964.1:p.Asp39Tyr	MODERATE			deleterious(0)	-1	Q60992
Tfap2e	Het	33_Het	chr4	126735588	G	C	32	56	27	5	56	0	SNP	2	S,M	15.625	0	ENSMUSG00000042477	ENSMUST00000048194	Transcript	missense_variant	p.Ala31Gly	-	341	92	31	A/G	gCc/gGc	-	mm10	P1	protein_coding	YES	CCDS18658.1		hmmpanther:PTHR10812,hmmpanther:PTHR10812:SF13	ENSMUSP00000035902	2021-02-07		1		ENSMUST00000048194.7:c.92C>G	ENSMUSP00000035902.7:p.Ala31Gly	MODERATE			tolerated(0.42)	-1	Q6VUP9
Ncf1	Het	33_Het	chr5	134227489	C	A	88	209	78	9	209	0	SNP	2	S,M	10.2273	0	ENSMUSG00000015950	ENSMUST00000016094	Transcript	stop_gained	p.Glu64*	-	248	190	64	E/*	Gag/Tag	-	mm10		protein_coding	YES	CCDS71674.1		Gene3D:3.30.1520.10,Pfam_domain:PF00787,PROSITE_profiles:PS50195,hmmpanther:PTHR15706,SMART_domains:SM00312,Superfamily_domains:SSF64268	ENSMUSP00000016094	2021-03-11		1		ENSMUST00000016094.12:c.190G>T	ENSMUSP00000016094.6:p.Glu64Ter	HIGH				-1
Doc2a	Het	33_Het	chr7	126851388	C	A	90	215	81	9	215	0	SNP	2	S,M	10	0	ENSMUSG00000052301	ENSMUST00000064110	Transcript	missense_variant	p.Arg279Ser	-	1486	835	279	R/S	Cgc/Agc	-	mm10	P1	protein_coding	YES	CCDS21847.1	192	Gene3D:2.60.40.150,Pfam_domain:PF00168,PIRSF_domain:PIRSF036931,Prints_domain:PR00399,PROSITE_profiles:PS50004,hmmpanther:PTHR10024,hmmpanther:PTHR10024:SF233,SMART_domains:SM00239,Superfamily_domains:SSF49562	ENSMUSP00000070119	2021-08-11		1		ENSMUST00000064110.13:c.835C>A	ENSMUSP00000070119.7:p.Arg279Ser	MODERATE			deleterious(0.03)	1	Q7TNF0
Bcl6	Het	8_Het	chr16	23973034	G	A	43	199	35	8	199	0	SNP	2	S,V	18.6047	0	ENSMUSG00000022508	ENSMUST00000023151	Transcript	missense_variant	p.Thr190Ile	-	897	569	190	T/I	aCa/aTa	-	mm10	P1	protein_coding	YES	CCDS28082.1		hmmpanther:PTHR19303:SF275,hmmpanther:PTHR19303	ENSMUSP00000023151	2021-05-10		1		ENSMUST00000023151.5:c.569C>T	ENSMUSP00000023151.5:p.Thr190Ile	MODERATE			deleterious(0.03)	-1	P41183
Bcl6	Bcl6	Bcl6_2_1	chr16	23972380	G	A	392	212	342	48	212	0	SNP	2	S,M	12.2449	0	ENSMUSG00000022508	ENSMUST00000023151	Transcript	missense_variant	p.Ala408Val	-	1551	1223	408	A/V	gCc/gTc	-	mm10	P1	protein_coding	YES	CCDS28082.1		Low_complexity_(Seg):seg	ENSMUSP00000023151	2021-05-10		1		ENSMUST00000023151.5:c.1223C>T	ENSMUSP00000023151.5:p.Ala408Val	MODERATE			tolerated(0.46)	-1	P41183
Pim1	Bcl6	Bcl6_2_1	chr17	29491352	A	T	223	187	198	25	187	0	SNP	2	S,M	11.2108	0	ENSMUSG00000024014	ENSMUST00000024811	Transcript	missense_variant	p.Gln37Leu	-	442	110	37	Q/L	cAg/cTg	-	mm10	P1	protein_coding	YES	CCDS79520.1		hmmpanther:PTHR22984,hmmpanther:PTHR22984:SF9,PIRSF_domain:PIRSF037993,Gene3D:3.30.200.20,Superfamily_domains:SSF56112	ENSMUSP00000024811	2021-02-06		1		ENSMUST00000024811.7:c.110A>T	ENSMUSP00000024811.7:p.Gln37Leu	MODERATE			tolerated(0.66)	1
Pim1	Bcl6	Bcl6_2_1	chr17	29491998	C	G	135	136	121	14	136	0	SNP	2	S,M	10.3704	0	ENSMUSG00000024014	ENSMUST00000024811	Transcript	missense_variant	p.Leu192Val	-	906	574	192	L/V	Ctg/Gtg	-	mm10	P1	protein_coding	YES	CCDS79520.1		PROSITE_profiles:PS50011,hmmpanther:PTHR22984,hmmpanther:PTHR22984:SF9,Gene3D:1.10.510.10,PIRSF_domain:PIRSF037993,Pfam_domain:PF00069,SMART_domains:SM00220,Superfamily_domains:SSF56112	ENSMUSP00000024811	2021-04-06		1		ENSMUST00000024811.7:c.574C>G	ENSMUSP00000024811.7:p.Leu192Val	MODERATE			tolerated(0.17)	1
Tlr1	Bcl6	Bcl6_2_1	chr5	64926075	C	G	275	220	247	28	220	0	SNP	2	S,M	10.1818	0	ENSMUSG00000044827	ENSMUST00000197315	Transcript	missense_variant	p.Gln386His	-	1629	1158	386	Q/H	caG/caC	-	mm10	P1	protein_coding	YES	CCDS19302.1		PROSITE_profiles:PS51450,hmmpanther:PTHR24365:SF261,hmmpanther:PTHR24365,Gene3D:3.80.10.10,PIRSF_domain:PIRSF037595,SMART_domains:SM00365,SMART_domains:SM00369,Superfamily_domains:SSF52058	ENSMUSP00000142500	2021-04-04		1		ENSMUST00000197315.4:c.1158G>C	ENSMUSP00000142500.1:p.Gln386His	MODERATE			deleterious(0.01)	-1	Q9EPQ1
Traf6	Bcl6	Bcl6_2_2	chr2	101684700	A	G	97	177	66	31	177	0	SNP	3	S,V,M	31.9588	0	ENSMUSG00000027164	ENSMUST00000004949	Transcript	missense_variant	p.Lys67Arg	-	606	200	67	K/R	aAg/aGg	-	mm10	P1	protein_coding	YES	CCDS16464.1		Gene3D:3.30.40.10,PIRSF_domain:PIRSF015614,hmmpanther:PTHR10131,hmmpanther:PTHR10131:SF85,Superfamily_domains:SSF57850	ENSMUSP00000004949	2021-03-08		1		ENSMUST00000004949.7:c.200A>G	ENSMUSP00000004949.7:p.Lys67Arg	MODERATE			tolerated(0.08)	1	P70196
Rev3l	Bcl6	Bcl6_2_3	chr10	39852045	A	C	206	198	156	50	198	0	SNP	3	S,V,M	24.2718	0	ENSMUSG00000019841	ENSMUST00000164763	Transcript	missense_variant	p.Asn2730Thr	-	8237	8189	2730	N/T	aAt/aCt	-	mm10	P1	protein_coding	YES	CCDS23790.1		hmmpanther:PTHR10322:SF5,hmmpanther:PTHR10322,Pfam_domain:PF00136,SMART_domains:SM00486,Superfamily_domains:SSF56672	ENSMUSP00000131519	26/33		1		ENSMUST00000164763.7:c.8189A>C	ENSMUSP00000131519.1:p.Asn2730Thr	MODERATE			deleterious(0.03)	1	Q61493
C3	Bcl6	Bcl6_2_3	chr17	57222952	C	T	218	208	173	45	208	0	SNP	3	S,V,M	20.6422	0	ENSMUSG00000024164	ENSMUST00000024988	Transcript	missense_variant	p.Arg508Gln	-	1624	1523	508	R/Q	cGg/cAg	-	mm10	P1	protein_coding	YES	CCDS37670.1		hmmpanther:PTHR11412,hmmpanther:PTHR11412:SF90,Pfam_domain:PF07703,SMART_domains:SM01359	ENSMUSP00000024988	13/41		1		ENSMUST00000024988.14:c.1523G>A	ENSMUSP00000024988.8:p.Arg508Gln	MODERATE			deleterious(0)	-1	P01027
Pold4	Bcl6	Bcl6_2_3	chr19	4232816	C	T	128	171	98	30	171	0	SNP	3	S,V,M	23.4375	0	ENSMUSG00000024854	ENSMUST00000025773	Transcript	stop_gained	p.Gln86*	-	449	256	86	Q/*	Caa/Taa	-	mm10	P1	protein_coding	YES	CCDS29424.1		Pfam_domain:PF04081,hmmpanther:PTHR14303	ENSMUSP00000025773	2021-03-04				ENSMUST00000025773.3:c.256C>T	ENSMUSP00000025773.3:p.Gln86Ter	HIGH				1	Q9CWP8
Traf6	Bcl6	Bcl6_2_3	chr2	101684700	A	G	159	177	83	76	177	0	SNP	3	S,V,M	47.7987	0	ENSMUSG00000027164	ENSMUST00000004949	Transcript	missense_variant	p.Lys67Arg	-	606	200	67	K/R	aAg/aGg	-	mm10	P1	protein_coding	YES	CCDS16464.1		Gene3D:3.30.40.10,PIRSF_domain:PIRSF015614,hmmpanther:PTHR10131,hmmpanther:PTHR10131:SF85,Superfamily_domains:SSF57850	ENSMUSP00000004949	2021-03-08		1		ENSMUST00000004949.7:c.200A>G	ENSMUSP00000004949.7:p.Lys67Arg	MODERATE			tolerated(0.08)	1	P70196
Fancd2	Bcl6	Bcl6_2_3	chr6	113553789	A	G	444	350	354	90	350	0	SNP	3	S,V,M	20.2703	0	ENSMUSG00000034023	ENSMUST00000204827	Transcript	missense_variant	p.Lys461Arg	-	1461	1382	461	K/R	aAg/aGg	-	mm10	A2	protein_coding	YES	CCDS20426.1		hmmpanther:PTHR32086,Pfam_domain:PF14631	ENSMUSP00000144928	16/43	cds_start_NF,cds_end_NF	1		ENSMUST00000204827.2:c.1382A>G	ENSMUSP00000144928.1:p.Lys461Arg	MODERATE			tolerated(0.5)	1	Q80V62
[truncated: 8 more columns]
